# Supplementary material for: The β8 integrin cytoplasmic domain activates extracellular matrix adhesion to promote brain neurovascular development
Source: Oxford University Press journal article supplement (doi:10.1242/dev.200472), 2022-02-26
Supplement: dev200472supp.pdf [file dev200472supp.pdf]

Supplemental Figure 1

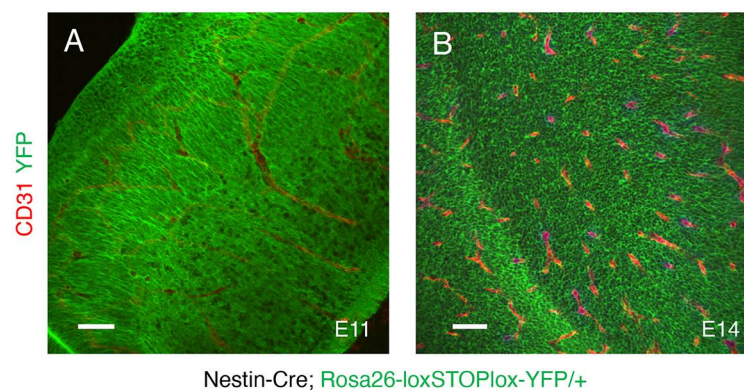

**Fig. S1. Analysis of Nestin-Cre-mediated recombination in embryonic brain neuroepithelial cells. (A, B);** The Nestin-Cre transgene is expressed in embryonic neuroepithelial cells, but is not expressed in brain blood vessels at E11 (A) and E14 (B) as revealed by the crossing with the Rosa26-loxSTOPlox-YFP reporter model.

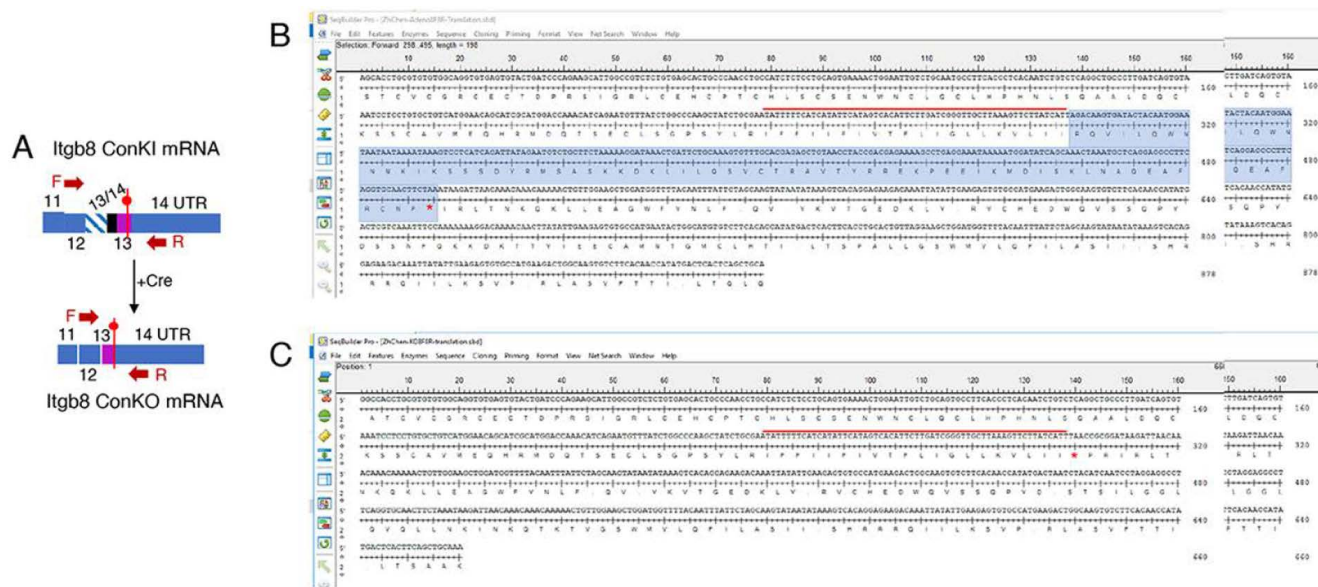

**Fig. S2. DNA sequencing confirms cytoplasmic domain deletion in cultured mouse Nestin-Cre;ConKO/+ cells. (A);** Cre-mediated recombination of the engineered Itgb8 locus removes the mini-gene (Ex13/14), resulting in a premature STOP codon that truncates the  $\beta 8$  integrin protein after the transmembrane domain. **(B, C);** Sanger sequencing of cDNA from E14 Nestin-Cre control and Nestin-Cre;ConKO/+ neurospheres confirmed selective ablation of the  $\beta 8$  integrin cytoplasmic tail coding sequence in Nestin-Cre;ConKO/+ neural progenitor cells. DNA sequences of the ConKI control (B) and ConKO mutant (C) Itgb8 allele confirms Cre-mediated deletion of the Ex13/14 mini-gene and expression of the truncated  $\beta 8$  integrin protein lacking the cytoplasmic signaling domain. The transmembrane sequence is indicated by the red line, and the cytoplasmic domain is indicated by the blue shaded region. The endogenous STOP codon in (B) and the engineered STOP codon in (C) are indicated by red asterisks.

Supplemental Figure 3

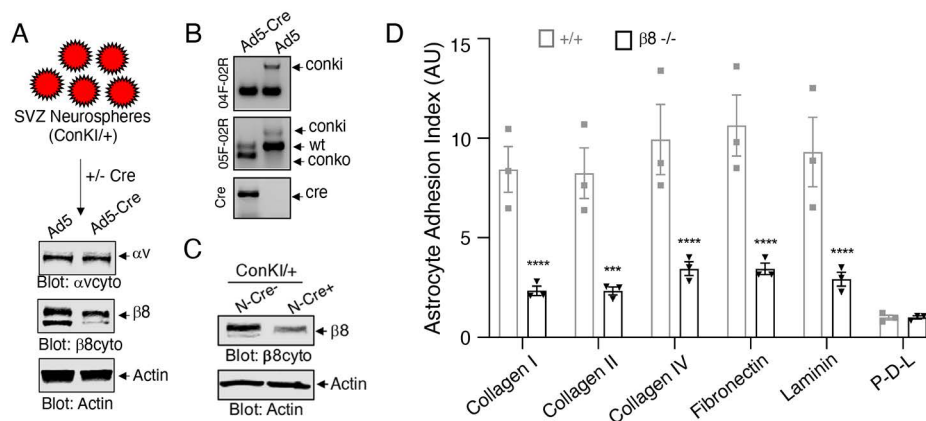

**Fig. S3. In vitro validation of Cre-mediated *Itgb8* mini-gene deletion and quantitation of  $\beta 8$  integrin ECM adhesion.** (A, B); Neurospheres cultured from the subventricular zone of the lateral ventricles of P60 ConKI/+ mice were infected with empty adenovirus (Ad5 control) or adenovirus-Cre (Ad5-Cre). Detergent-soluble lysates were analyzed by immunoblotting with anti- $\alpha v$ cyto or anti- $\beta 8$ cyto integrin antibodies (see Figure 2A). Note the reduction in  $\beta 8$  integrin protein due to truncation of the cytoplasmic domain. Alternatively, Cre-mediated deletion of the floxed mini-gene in the engineered *Itgb8* locus was confirmed by genomic PCR (B). (C); Neurospheres from E14 control (ConKI/+) or Nestin-Cre;ConKO/+ P0 mice were analyzed by immunoblotting. Note the reduce expression of full-length  $\beta 8$  integrin protein in the neurosphere samples from Nestin-Cre;ConKO/+ embryos. (D); Wild type control or  $\beta 8$ <sup>-/-</sup> astrocytes were added to tissue culture wells coated with the indicated ECM proteins and cell adhesion was quantified after 2 hours. Note that  $\beta 8$ <sup>-/-</sup> astrocytes show severe ECM adhesion defects similar to the defects with N-Cre;ConKO/+ astrocytes (Figure 2C). Differences between groups were analyzed using two-way ANOVA and Tukey post-hoc analysis (n=3, mean  $\pm$  SEM, \*\*\*p<0.001, \*\*\*\*p<0.0001).

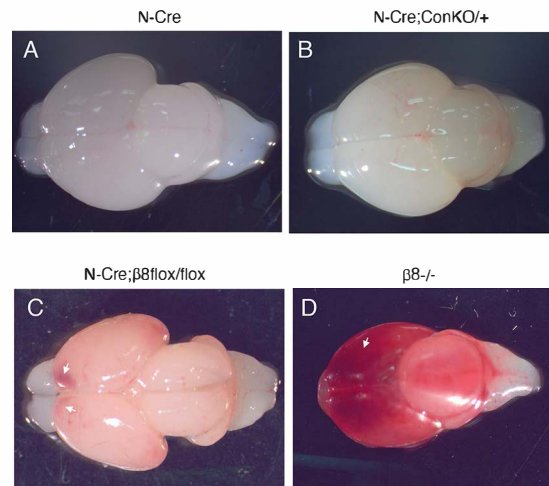

**Fig. S4. Lack of intracerebral hemorrhage in Nestin-Cre;ConKO embryos. (A-D);** Images of isolated brains from an E18 control (A), Nestin-Cre;ConKO/+ (B), Nestin-Cre;β8flox/flox (C) and β8<sup>-/-</sup> embryo (D). Note the absence of grossly obvious hemorrhage in the Nestin-Cre;ConKO/+ brains that is less severe than the hemorrhage in the Nestin-Cre;β8flox/flox and β8<sup>-/-</sup> mutants.

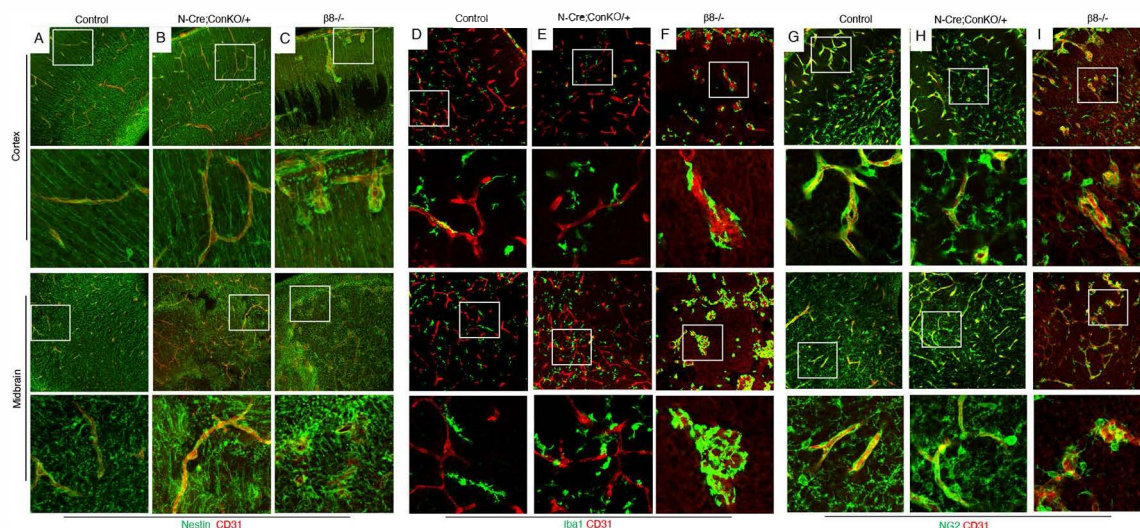

**Fig. S5. Neurovascular pathologies in the E18 Nestin-Cre;ConKO/+ brain. (A-C);** Sagittal sections through forebrain/neocortical regions or midbrain regions of E18 Nestin-Cre control (A), Nestin-Cre;ConKO/+ (B), or  $\beta 8^{-/-}$  embryos (C) were analyzed by double immunofluorescence using anti-CD31 antibodies to detect vascular endothelial cells combined with anti-Nestin to detect neuroepithelial cells. **(D-F);** Sagittal sections through the forebrains/neocortical regions of E18 Nestin-Cre control (D), Nestin-Cre;ConKO/+ (E), or  $\beta 8^{-/-}$  embryos (F) were analyzed by double immunofluorescence using anti-CD31 antibodies to detect vascular endothelial cells combined with anti-Iba1 to detect microglial cells. **(G-I);** Sagittal sections through the forebrains/neocortical regions of E18 Nestin-Cre control (G), Nestin-Cre;ConKO/+ (H), or  $\beta 8^{-/-}$  embryos (I) were analyzed by double immunofluorescence using anti-CD31 antibodies to detect vascular endothelial cells combined with anti-NG2 to detect vascular pericytes.



Supplemental Figure 6

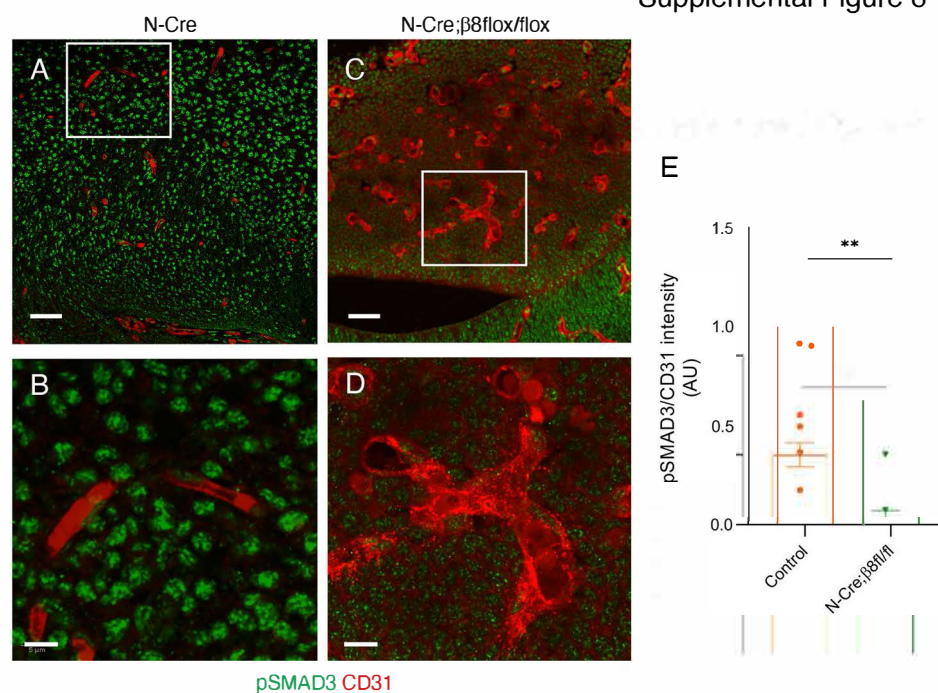

**Fig. S6. Conditional knockout of  $\beta 8$  integrin in brain neuroepithelial cells leads to reduced canonical TGF $\beta$  receptor signaling in vascular endothelial cells. (A-D);** Analysis of Smad3 phosphorylation in sagittal brain sections through telencephalic regions of E14 N-Cre control (A, B) and N-Cre; $\beta 8$ flox/flox embryos (C, D). Note the abnormal CD31<sup>+</sup> blood vessel morphologies in N-Cre; $\beta 8$ flox/flox brains, with reduced levels of pSmad3. The lower panels are higher magnification images of the boxed areas in the upper panels. (E): Quantification of pSmad3 levels in E14 Nestin-Cre control and Nestin-Cre; $\beta 8$ flox/flox mutant midbrain regions as determined by the bar graph measuring fluorescence intensity of pSmad3 relative to CD31

Supplemental Figure 7

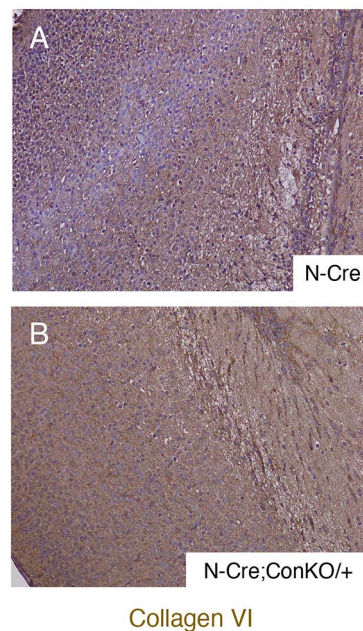

**Fig. S7. Analysis of collagen VI protein expression in Nestin-Cre control and Nestin-Cre;ConKO/+ P0 brain sections. (A, B);** Formalin fixed and paraffin embedded control (A) and mutant (B) sagittal brain sections were labeled with an anti-Collagen VI antibody. Note the increased levels of Collagen VI expression in the Nestin-Cre;ConKO/+ cortex, versus the control cortex.

Supplemental Figure 8

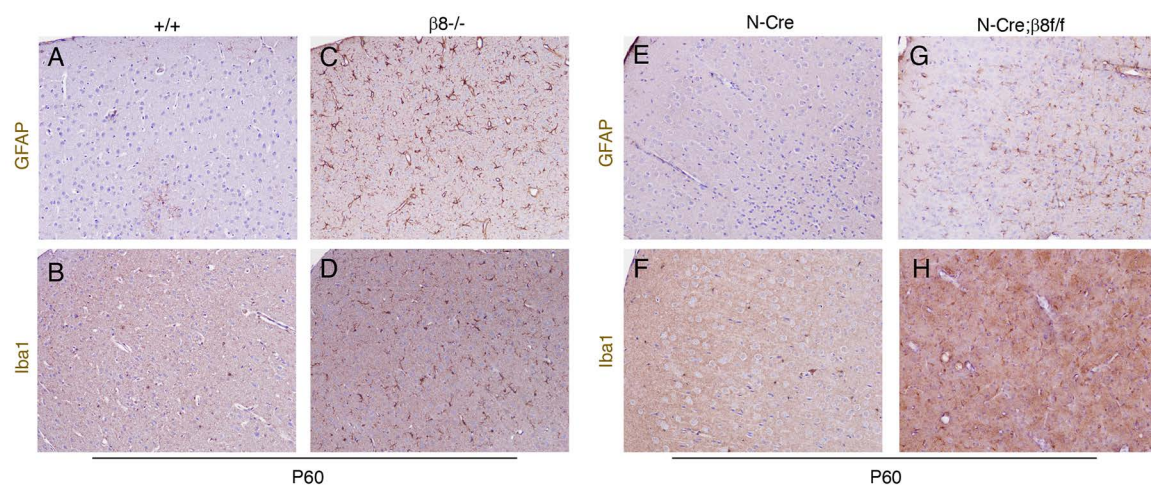

**Fig. S8. Brain vascular pathologies in  $\beta 8^{-/-}$  and Nestin-Cre; $\beta 8^{flox/flox}$  adult mice.**

**(A-D);** Coronal brain sections through the cerebral cortices of wild type control (A, B) or  $\beta 8^{-/-}$  (C, D) P60 mice were immunohistochemically labeled with anti-GFAP (A, C) and anti-Iba1 (B, D) antibodies to visualize astrocytes and microglia, respectively. **(E-H);** Coronal brain sections through the cerebral cortices of Nestin-Cre control (E, F) or Nestin-Cre; $\beta 8^{flox/flox}$  (G, H) P60 mice were immunohistochemically labeled with anti-GFAP (E, G) and anti-Iba1 (F, H) antibodies to visualize astrocytes and microglia, respectively. In comparison to control brain sections, note the obvious perivascular Iba1<sup>+</sup> microgliosis and GFAP<sup>+</sup> astrogliosis in mutant brain sections.



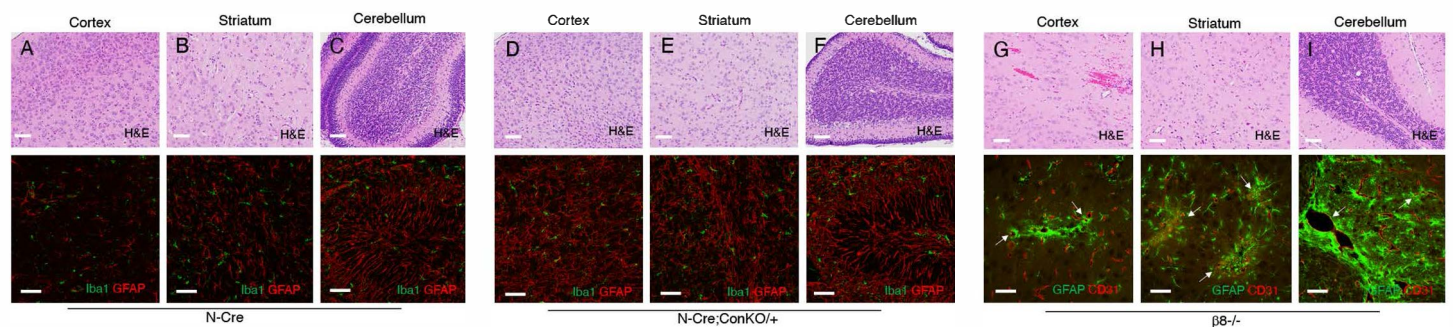

**Fig. S9. Microscopic analysis of brains from Nestin-Cre control and Nestin-Cre;ConKO/+ neonatal mice at P10. (A-F);** Sagittal brain sections from P10 Nestin-Cre control (A-C) or Nestin-Cre;ConKO/+ mutant mice (D-F) through the cerebral cortex (A, D), striatum (B, E), and cerebellum (C, F) were fixed, paraffin embedded and stained with H&E (upper panels). Alternatively, P10 brains were sectioned with a vibratome and fluorescently labeled with anti-Iba-1 (green) and anti-GFAP (red) antibodies to reveal microglia and astrocytes, respectively. Note the astrogliosis in Nestin-Cre;ConKO/+ mutant brain sections, whereas there is an obvious lack in microgliosis. (D-F). **(G-I);** Sagittal brain sections from P16  $\beta 8^{-/-}$  mutant mice through the cerebral cortex (G), striatum (H), and cerebellum (I) were fixed, paraffin embedded and stained with H&E (upper panels). Alternatively, paraffin embedded brain sections were fluorescently labeled with anti-GFAP (green) and anti-CD31 (red) antibodies to reveal astrocytes and endothelial cells, respectively. Note the microscopic hemorrhage in the cortex (G) as well as robust astrogliosis throughout the  $\beta 8^{-/-}$  brain.

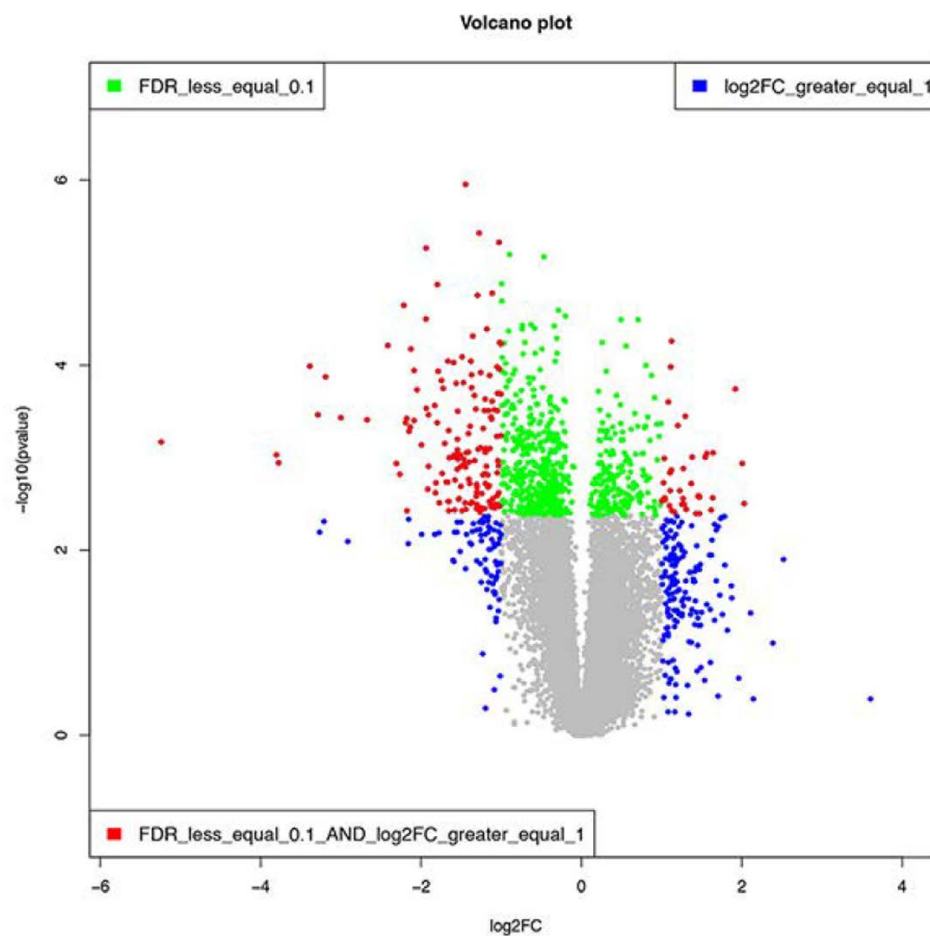

**Fig. S10. Volcano plot showing mRNAs in brain endothelial cells that are upregulated and downregulated after Tgfb2 gene ablation.** Quantitative RNA sequencing comparisons reveal differentially expressed genes in PDGFBB-CreERT2f/+ or PDGFBB-CreERT2;Tgfb2f/f brain endothelial cells isolated from P7 mice as revealed by a color-coded volcano plot. Red indicates higher mRNA expression levels and blue indicates lower expression. Differentially expressed genes were identified using the EdgeR package with adjusted p-value cutoffs  $<0.05$  and  $\log_2$  fold changes  $> 2$ .

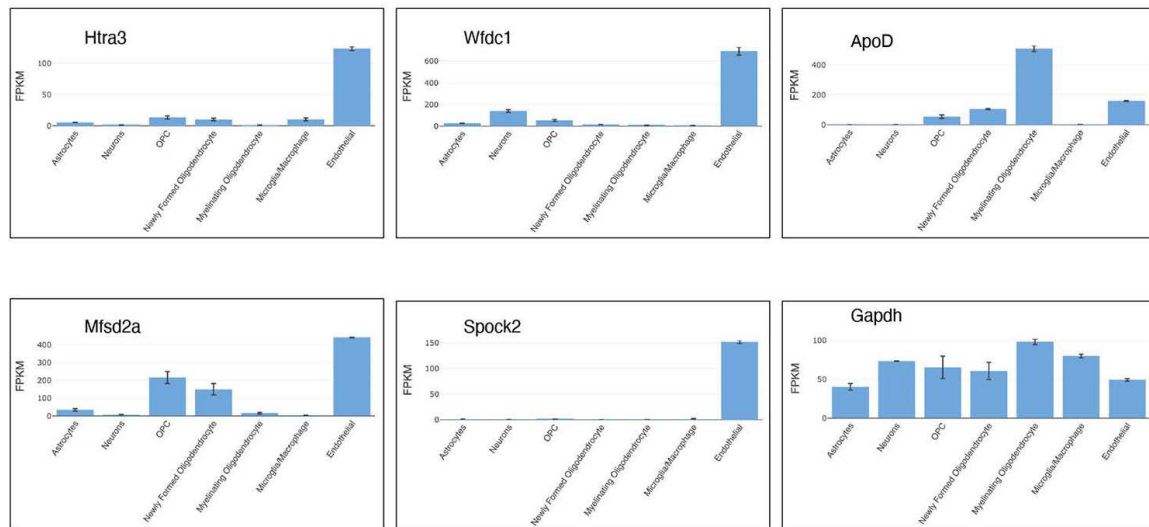

**Fig. S11. Validation of brain endothelial cell expression of Tgfr2-regulated mRNAs identified by quantitative RNA sequencing.** Analysis of the brain RNA-seq database (brainrnaseq.org) confirms that the various genes down-regulated after ablation of Tgfr2 with PDGFBB-CreERT2 at P7 are expressed mainly in brain endothelial cells. In these experiments brain endothelial cells were isolated from P7 Tie2-GFP mice. Gapdh, which is a more broadly expressed gene, is shown as a relative control.

**Table S1. Commercial primary antibodies**

| Primary Antibody                               | Host(s)                    | Dilution/<br>Concentration              | Application          | Catalog #                             | Manufacturer              |
|------------------------------------------------|----------------------------|-----------------------------------------|----------------------|---------------------------------------|---------------------------|
| Nestin                                         | Chicken mAb                | 1:100                                   | IF                   | CH23001                               | Neuromics                 |
| Iba1                                           | Rabbit pAb                 | 1:250                                   | IF                   | 019-19741                             | Fujifilm WPC              |
| Iba1                                           | Rabbit pAb                 | 1:250                                   | IHC-P                | 013-27691                             | Fujifilm WPC              |
| pSMAD3 (S423+S425)                             | Rabbit mAb                 | 1:200                                   | IF                   | ab-52903                              | Abcam                     |
| NG2                                            | Rabbit pAb                 | 1:200                                   | IF                   | AB5320                                | Millipore Sigma           |
| CD31                                           | Rat mAb                    | 1:200                                   | IF                   | 553370                                | BD Biosciences            |
| CD31                                           | Goat pAb                   | 1:250                                   | IHC-F                | AF3628                                | R&D Systems               |
| GFAP                                           | Chicken pAb                | 1:4000                                  | IHC-F, IF            | NBP1-05198                            | Novus                     |
| GFAP                                           | Rabbit pAb                 | 1:500                                   | IHC-F, IF            | Z0334                                 | Dako                      |
| GFP                                            | Chicken                    | 1:2000                                  | IHC-F, IF            | GFP-1020                              | Aves                      |
| GFP                                            | Rabbit                     | 1:1000                                  | IHC-F, IF            | ab290                                 | Abcam                     |
| Isolectin GS-IB <sub>4</sub> -Alexa Fluor™ 488 | G. <i>simplicifolia</i>    | 1:500                                   | IF                   | I21411                                | ThermoFisher              |
| Laminin                                        | Rabbit pAb                 | 1:100                                   | IHC-P                | L9393                                 | Sigma Aldrich             |
| Vav1                                           | Rabbit pAb                 | 1:1000                                  | WB                   | 2502                                  | Cell Signaling Technology |
| Collagen VI                                    | Rabbit pAb                 | 1:1000                                  | WB                   | 17023-1-AP                            | Proteintech               |
| β8-cyto                                        | Rabbit pAb                 | 1:3000                                  | WB, IP               | Custom-made                           | Covance                   |
| αv-cyto                                        | Rabbit pAb                 | 1:3000                                  | WB, IP               | Custom-made                           | Covance                   |
| β8-ex                                          | Rabbit pAb                 | 1:1000-1:3000                           | WB, IP               | Custom-made                           | Covance                   |
| β-actin                                        | Mouse mAb                  | 1:3000                                  | WB                   | A5441                                 | Sigma Aldrich             |
| α-actinin                                      | Mouse mAb                  | 1:3000                                  | WB                   | AB18061                               | Abcam                     |
| β-actin                                        | Rabbit pAb                 | 1:1000-1:3000                           | WB                   | BS-0061R-TR                           | Bioss                     |
| IgG (control)                                  | Rabbit, rat, chicken, goat | 1-5 µg/mL (titred based on application) | WB, IF, IHC-P, IHC-F | AB-105-C, 6-001-A, AB-101-C, AB-108-C | R&D Systems               |

**Table S1. Commercial secondary antibodies:**

| <b>Secondary Antibody</b>     | <b>Host</b> | <b>Dilution</b> | <b>Catalog #</b> | <b>Manufacturer</b>    |
|-------------------------------|-------------|-----------------|------------------|------------------------|
| IRDye® anti-Rabbit 800CW      | Goat        | 1:15,000        | 926-32211        | LI-COR                 |
| IRDye® anti-Mouse 680CW       | Goat        | 1:15,000        | 926-68070        | LI-COR                 |
| IRDye® anti-Rabbit 800CW      | Donkey      | 1:15,000        | 926-32213        | LI-COR                 |
| IRDye® anti-Mouse 680CW       | Donkey      | 1:15,000        | 926-68072        | LI-COR                 |
| IRDye® Streptavidin 800CW     | na          | 1:5,000         | 926-32230        | LI-COR                 |
| Alexa Flour® 488 anti-Chicken | Donkey      | 1:500           | 703-545-155      | Jackson ImmunoResearch |
| Alexa Flour® 488 anti-Rabbit  | Donkey      | 1:500           | 711-545-152      | Jackson ImmunoResearch |
| Alexa Flour® 594 anti-Rat     | Donkey      | 1:500           | 712-585-153      | Jackson ImmunoResearch |
| Alexa Flour® 594 anti-Goat    | Donkey      | 1:500           | 705-585-147      | Jackson ImmunoResearch |



**Table S2.** Primers used for quantitative real time PCR

| Gene                | Primer Sequence (5'-3')                   |
|---------------------|-------------------------------------------|
| <i>mouse</i> Gapdh  | <i>Forward:</i> GAATGGGAAGCTTGTTCATCAACGG |
|                     | <i>Reverse:</i> GTAGACTCCACGACATACTCAGCAC |
| <i>mouse</i> Tgfbr2 | <i>Forward:</i> TTAACATGATGTCATGGCCAGCG   |
|                     | <i>Reverse:</i> AGACTTCATGCGGCTTCTCACAGA  |
| <i>mouse</i> Mfsd2a | <i>Forward:</i> CCGGTCCAGGTGAAGAAGGAAC    |
|                     | <i>Reverse:</i> GCTCGGCCCAAAAAAGGATA      |
| <i>mouse</i> Apod   | <i>Forward:</i> GAAGCCAAACAGAGCAACG       |
|                     | <i>Reverse:</i> TGTTTCTGGAGGGAGATAAGGA    |
| <i>mouse</i> Htra3  | <i>Forward:</i> CTCGGGCTTCATCATGTCAGA     |
|                     | <i>Reverse:</i> AATCGTGGCAATGTCCGACTT     |
| <i>mouse</i> Spock2 | <i>Forward:</i> ACTGTGATGACATCGTGGGTT     |
|                     | <i>Reverse:</i> TCTTCTGGCCTGTCTTTCTGG     |
| <i>mouse</i> Wfdc1  | <i>Forward:</i> TGTCCCTCAGGCTATGAGTG      |
|                     | <i>Reverse:</i> AAGTGCCTCTGTTGTCCCTTC     |
